# Supplementary material
Source: publisher figshare collection journal article supplement (https://adisjournals.figshare.com/articles/dataset/_/23508390)
Supplement: Supplementary file 1 [file 1]

# The Development of Ofatumumab, a Fully Human Anti-CD20 Monoclonal Antibody for Practical Use in Relapsing Multiple Sclerosis Treatment

Stephen L. Hauser, Ludwig Kappos, Amit Bar-Or, Heinz Wiendl, David Paling, Mitzi Williams, Ralf Gold, Andrew Chan, Ron Milo, Ayan Das Gupta, Goeril Karlsson, Roseanne Sullivan, Gordon Graham, Martin Merschhemke, Dieter A. Häring, Patrick Vermersch

### What are the key objectives of the article?

To discuss the clinical development and characteristics of ofatumumab (OMB) for the treatment of relapsing multiple sclerosis (RMS)

### Global OMB clinical program in RMS

OMB is the first fully human low-dose anti-CD20 monoclonal antibody approved for treatment in adults with RMS<sup>1-3</sup>

5 completed phase 2/3 clinical trials

~37,127 patient treatment years of cumulative post-marketing exposure (as of Sept 2022)

1 ongoing long-term open-label extension study

### EFFICACY

**OMB rapidly reduced B-cell counts<sup>4-8</sup>**

Rapid B-cell depletion that is sustained between monthly doses

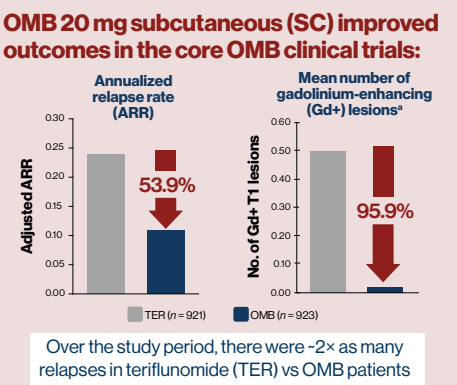

### SAFETY

Mean **immunoglobulin (Ig) G** levels remained **stable** and **IgM** levels remained within the **normal range**<sup>9,10</sup>

Rapid B-cell repletion after treatment cessation<sup>8</sup>

**For OMB- and TER-treated patients in the core OMB clinical trials:**

| Parameter                       | Ofatumumab (N = 946) | Teriflunomide (N = 936) |
|---------------------------------|----------------------|-------------------------|
| ASCLEPIOS I/II ≥1 Adverse event | 83.6%                | 84.2%                   |
| Infections and infestations     | 51.6%                | 52.7%                   |
| Serious infections              | 2.5%                 | 1.8%                    |

**Pooled data from the core OMB clinical trials confirmed a high level of efficacy and similar safety profile to TER for the OMB 20 mg SC regimen for relapsing forms of MS**

### TOLERABILITY

**Injection-related reactions (IRRs) were primarily observed with the first injection<sup>11</sup>:**

Substantially decreased with further injections

The majority of IRRs (~99.8%) were mild/moderate<sup>11</sup>

Low incidence of serious IRRs<sup>11</sup> with OMB 20 mg SC

98.8% of patients were compliant with OMB 20 mg SC in the core OMB trials<sup>12</sup>

### ADMINISTRATION

**At-home self-administration of OMB 20 mg SC:**

- Convenience
- No need to visit infusion centers
- No pre-medication required
- Reduced burden (patients and healthcare centers) and costs

<sup>a</sup>Per T1-weighted magnetic resonance imaging scan.

1. Bar-Or A, et al. CNS Drugs. 2021;35(9):985-997; 2. Novartis Ireland Ltd. KESIMPTA (ofatumumab) Summary of Product Characteristics. 2021. <https://www.ema.europa.eu/en/medicines/human/EPAR/kesimpta>. Accessed Dec 2022; 3. Kesimpta® US Prescribing Information. 2020. [https://www.accessdata.fda.gov/drugsatfda\\_docs/label/2020/125326s0701bl.pdf](https://www.accessdata.fda.gov/drugsatfda_docs/label/2020/125326s0701bl.pdf). Accessed Dec 2022; 4. Hauser SL, et al. N Engl J Med. 2020;383(6):546-557; 5. Sorensen PS, et al. Neurology. 2014;82(7):573-581; 6. Bar-Or A, et al. Neurology. 2018;90(20):e1805-e1814; 7. Savelle M, et al. Mult Scler. 2022;28(6):910-924; 8. Yu H, et al. CNS Drugs. 2022;36(3):283-300; 9. Hauser SL, et al. Mult Scler. 2022;28(10):1576-1590; 10. Saccà F, et al. Oral presentation at: 8th European Academy of Neurology (EAN) Congress; Vienna, Austria; June 25-28, 2022, OPR134; 11. Bar-Or A, et al. Presented at: 8th Joint ACTRIMS-ECTRIMS Meeting; Virtual; September 11-13, 2020, 0316; 12. Alvarez E, et al. Mult Scler. 2022;28(3 suppl):P734.

This graphical abstract represents the opinions of the authors. For a full list of declarations, including funding, author disclosures, and copyright information, please see the full text online. © The authors. CC-BY-NC 2023

PEER-REVIEWED FEATURE
